# Supplementary material for: A Hybrid Fuzzy Wavelet Neural Network Model with Self‐Adapted Fuzzy c‐Means Clustering and Genetic Algorithm for Water Quality Prediction in Rivers
Source: Hindawi journal article supplement (doi:10.1155/2018/8241342), 2018-01-01
Supplement: f1 [file 8241342.f1.doc]

**Supplementary Information**

**A hybrid fuzzy** **wavelet neural network model with** **self-adapted fuzzy c-means clustering and** **genetic algorithm for** **water quality prediction in rivers**

Mingzhi Huang1,2*, Di Tian2, Hongbin Liu3, Chao Zhang2, Xiaohui Yi1,Jiannan Cai4, Jujun Ruan5*, Tao Zhang5*, Shaofei Kong6, Guangguo Ying1

*1*Environmental Research Institute, Key Laboratory of Theoretical Chemistry of Environment Ministry of Education, South China Normal University, Guangzhou 510631, PR China

*2*School of Geography and Planning, Guangdong Provincial Key Laboratory of Urbanization and Geo-simulation, Sun Yat-sen University, Guangzhou 510275, PR China

*3*Jiangsu Co-Innovation Center of Efficient Processing and Utilization of Forest Resources, Nanjing Forestry University, Nanjing 210037, China

4Zhongshan Environmental Monitoring Station, Zhongshan 528400, China

*5*School of Environmental Science and Engineering, Sun Yat-Sen University, Guangzhou 510275, China

6Department of Atmospheric Sciences, School of Environmental Studies, China University of Geosciences (Wuhan), Wuhan 430074, China

*Corresponding author.

E-mail: hmz2002xa@163.com(MZ.H);

E-mail: ruanjujun@mail.sysu.edu.cn(JJ.R);

E-mail: zhangt47@mail.sysu.edu.cn(T.Z)

**1. Determining the parameters of FWNNTU**

The center and the width parameters of the membership functions ( and ), the dilation and the translation parameters of the wavelet functions (and ), and the weight of the wavelet networks () were drawn, as shown in Table S1- S4.

**Table S1 Gaussian function parameters of FWNNCOD**

| Rules | WT | | pH | | DO | | EC | | NH4+-N | |
| --- | --- | --- | --- | --- | --- | --- | --- | --- | --- | --- |
|  | q |  | q |  | q |  | q |  | q |
| 1 | 0.1458 | -0.2025 | 0.7947 | 4.1961 | 0.3876 | -0.9960 | -0.0519 | -0.4472 | 0.7600 | -0.6485 |
| 2 | 0.5035 | -0.6888 | 0.8834 | -0.2103 | 0.1212 | -0.7722 | 0.2863 | -0.5181 | 0.1038 | -1.873E+2 |
| 3 | 0.2854 | -23.2486 | 0.4769 | 0.0696 | 0.8655 | -46.9647 | -1.0661 | 3.3556E+2 | 0.0906 | 10.2709 |
| 4 | -0.7314 | -0.7187 | 0.4236 | 0.6277 | 1.6241 | 0.9172 | 0.4206 | -1.0685 | -0.3616 | -0.9642 |
| 5 | -0.2808 | -41.1322 | 0.3526 | -0.3078 | -1.0446 | -1.0099E+2 | -0.9398 | -0.9786 | 0.0621 | -0.2363 |
| 6 | 0.3787 | 0.9130 | -0.4133 | -0.2086 | -0.7643 | 1.1135 | -0.0318 | -1.1730 | 0.7062 | 0.3131 |
| 7 | 0.3651 | -2.6949 | 0.5810 | 0.9221 | -0.1784 | 0.8600 | 0.3055 | 0.5594 | -0.5008 | -0.1067 |
| 8 | 0.5616 | -0.3665 | 0.0163 | -0.2697 | -1.2993 | 0.1209 | 0.2691 | 2.4684 | -0.1394 | 0.1979 |
| 9 | -0.7946 | 4.0699 | 0.7893 | -0.1689 | -0.3451 | -0.8804 | 0.1240 | 45.5228 | -1.2224 | 0.4141 |
| 10 | -1.0500 | 0.6484 | -1.9157 | -1.5974 | 0.5069 | -0.5305 | -0.2840 | 0.8394 | -0.2457 | 0.8704 |
| 11 | 0.3427 | -0.3905 | 0.1001 | -0.2736 | 0.3427 | 0.3011 | -0.3441 | -0.2127 | -0.8905 | -0.4422 |
| 12 | -0.9243 | 0.3895 | -0.0040 | -0.8679 | -0.8673 | -0.9162 | 0.8170 | -0.5279 | 0.6005 | 1.1021 |
| 13 | 0.3639 | 0.8210 | 0.8861 | 0.4874 | -1.1282 | 0.8241 | -0.3282 | -0.1007 | -0.5524 | -0.4342 |
| 14 | 0.9393 | -0.6993 | 0.3664 | -0.3274 | 0.0451 | -0.4932 | 0.5916 | 0.3450 | -0.6398 | -0.6126 |
| 15 | 0.4296 | 0.7806 | 0.6643 | 0.5275 | 0.4787 | 0.6285 | -0.4289 | -0.4700 | 0.6492 | 0.5499 |
| 16 | 0.9321 | -0.6484 | -0.3340 | 41.2629 | 0.5828 | 0.2537 | 0.4030 | 3.0268 | -0.3973 | 0.3676 |
| 17 | 0.5945 | 0.7937 | -0.1273 | 0.5936 | 0.9940 | -0.8065 | -0.8629 | -0.5987 | 0.2017 | 0.3695 |
| 18 | -0.5924 | -1.5035 | 0.6966 | 0.2303 | -0.1882 | -0.4487 | 1.1181 | 1.5628E+2 | 0.8324 | 0.5310 |
| 19 | -0.4412 | -0.9388 | 0.6252 | 0.1721 | -0.2616 | -0.6809 | -0.3309 | -0.7456 | -0.1792 | 0.4111 |
| 20 | 0.3037 | 4.5380 | 0.3070 | 0.1881 | 0.3176 | -0.3265 | -0.8456 | 0.0827 | -0.7917 | 20.5914 |
| 21 | -0.7198 | -0.4867 | -0.7619 | 21.2679 | -0.0180 | -1.0084 | 0.1049 | -0.5073 | -0.1719 | -0.8513 |
| 22 | 0.1132 | -0.1734 | -0.6808 | -0.9692 | -0.4516 | 2.0055 | -0.7476 | -0.6505 | 0.8191 | -0.6105 |
| 23 | 0.4585 | -0.6878 | 7.2208 | 1.4309E+4 | 1.0119 | 0.4858 | -0.2996 | 0.1037 | 1.4406 | -1.1575E+2 |
| 24 | -0.5930 | 1.0850 | -0.3793 | 0.3506 | -0.6764 | 0.2292 | 0.8594 | -0.5700 | 0.3915 | 0.6477 |
| 25 | 0.9250 | 0.6558 | 0.9001 | -0.5645 | -0.1353 | 0.4597 | 0.0064 | -0.7144 | 0.8496 | 0.3231 |
| 26 | 0.6613 | 1.0644 | -0.5907 | 0.8075 | 0.0828 | -0.5095 | -0.0430 | 0.1525 | 0.2844 | 0.8012 |
| 27 | 0.4342 | -6.8600 | 0.3917 | 323.1455 | -0.1104 | 17.1381 | 0.9599 | -0.5643 | -0.3099 | 0.5193 |
| 28 | 0.2394 | -0.6249 | -0.4671 | 0.3642 | -0.4232 | -0.5226 | -0.3646 | 0.3411 | -0.2061 | -0.2325 |
| 29 | -0.2814 | -0.5502 | 1.1662 | -1.0469E+4 | 0.6829 | 1.5020 | -0.7276 | 1.6902E+2 | 0.4764 | 0.2972 |
| 30 | 0.0024 | -0.2074 | -0.4008 | -0.7522 | 0.1167 | 0.1131 | -0.4617 | -4.2111E+2 | 0.6113 | 0.8798 |
| 31 | 0.0535 | 0.0963 | -0.0157 | 0.1615 | -0.2803 | -6.7768 | -0.3402 | -0.9057 | -0.8897 | 0.5282 |
| 32 | -0.8493 | -0.6360 | 0.1433 | -25.6848 | -0.7955 | 2.9657 | 0.0966 | -2.4084 | 0.8158 | 0.3065 |
| 33 | 0.7554 | -0.2194 | 1.0951 | -0.5640 | -0.3588 | -0.6464 | 0.1212 | -0.8333 | 0.0761 | -0.3213 |
| 34 | -0.4292 | 0.1815 | 0.3927 | 0.1717 | 0.9955 | 38.7964 | 0.4166 | -0.8665 | -0.9737 | -0.8661 |
| 35 | -1.0056 | 0.6557 | -0.9790 | 0.5128 | 0.4365 | -0.6216 | -1.1502 | -0.7258 | 0.5215 | 5.1303 |
| 36 | -0.2139 | 0.5188 | 0.1272 | 0.4810 | 0.3385 | 0.7882 | 0.7343 | 0.5024 | -0.2924 | 0.8153 |
| 37 | 0.9605 | -0.9064 | 0.6697 | -0.2910 | 0.2599 | 0.7267 | 0.8598 | -4.1286 | 1.2819 | 0.8731 |
| 38 | -1.5249 | 0.4795 | 0.1644 | -0.8425 | 0.6343 | 0.6601 | -0.5482 | 0.9520 | -0.9637 | 1.2843 |
| 39 | -3.8292 | 4.4005E+4 | -0.0668 | 0.4156 | -1.0725 | 35.3621 | -0.2608 | -0.0923 | 0.7068 | 5.3327E+2 |
| 40 | 0.2268 | -0.1817 | 0.3955 | -0.3729 | 0.0989 | 0.2007 | -1.3797 | -0.6070 | -0.1498 | -0.5128 |
| 41 | -0.5885 | -0.7079 | 0.8236 | -23.8760 | 0.4004 | -0.3413 | -0.8252 | -0.9057 | 0.1236 | 0.5273 |
| 42 | -0.5730 | -14.7806 | -0.4440 | -0.2259 | -0.7352 | 0.7862 | 0.8955 | -135.5863 | -0.3512 | -0.1312 |
| 43 | 0.2456 | 0.7212 | 0.2350 | -0.2155 | -0.3196 | -0.4895 | 1.3019 | -9.0123E+2 | 1.0671 | 0.1461 |
| 44 | -0.3813 | 0.7949 | 0.7650 | -0.3255 | -0.4468 | -0.6523 | -0.7565 | -0.2785 | 1.0011 | -0.6903 |
| 45 | 0.2230 | -0.3524 | 0.4722 | 31.1156 | -0.8169 | -0.3418 | -0.1664 | 1.4276 | -1.5816 | -0.5113 |
| 46 | 0.0599 | 0.8934 | -0.4845 | 0.1627 | -0.6111 | -0.5522 | -0.6528 | -0.5410 | -0.7392 | -0.6299 |
| 47 | -0.0027 | -0.2517 | -0.0538 | -0.9211 | 0.7034 | 0.7020 | -34.2301 | -3.2702E+5 | 0.0330 | 0.5401 |
| 48 | -0.3726 | -20.4894 | -0.5282 | 0.8996 | 0.4986 | -9.5981 | 0.5421 | -0.2526 | 0.1601 | -0.3811 |

**Table S2 The wavelet layer parameters of FWNNCOD**

| Rules |  | WT | | pH | | DO | | EC | | NH4+-N | |
| --- | --- | --- | --- | --- | --- | --- | --- | --- | --- | --- | --- |
| *a* | *b* | *a* | *b* | *a* | *b* | *a* | *b* | *a* | *b* |
| 1 | 1.2065 | 1.2602 | 1.2835 | -0.2973 | -4.0709 | -0.0600 | -0.9789 | -1.0155 | -0.6886 | 0.0083 | -1.0483 |
| 2 | 2.5885 | -0.6766 | -1.1562 | 0.3843 | -0.2345 | -0.0406 | -1.2761 | 0.0980 | -1.3581 | 0.4576 | -0.8528 |
| 3 | 1.5137 | 1.0955 | -0.2380 | -0.3197 | -1.7726 | -0.2757 | -2.8636 | -1.0361 | -1.0216 | -1.1017 | -1.7281 |
| 4 | 1.2073 | 1.5560 | 0.6458 | 0.2923 | -2.2071 | -1.1894 | 0.5401 | 0.0001 | -0.8508 | 1.9685 | 0.8220 |
| 5 | 0.4687 | -0.1001 | -1.1476 | -0.6845 | -2.9424 | -0.4522 | -1.2347 | 0.6375 | -0.4717 | 0.8515 | 0.1370 |
| 6 | 0.7637 | 0.1666 | 1.7904 | 2.1897 | 1.8385 | -1.5809 | -0.0069 | -0.0432 | -1.2610 | -0.0448 | -1.2574 |
| 7 | 1.7766 | -0.0336 | 1.1915 | -0.0743 | 1.4206 | 1.6207 | 0.8430 | -1.2203 | -1.1013 | -1.2821 | -0.8201 |
| 8 | 0.1570 | 0.0748 | -0.6980 | -0.2235 | 1.2690 | 0.8147 | 0.6322 | 0.0003 | -0.6204 | -0.7465 | -0.2653 |
| 9 | 0.2969 | 2.4904 | 1.9352 | 0.6869 | -3.3842 | 2.3946 | 2.0296 | 0.0203 | 1.8693 | 0.1239 | -1.7259 |
| 10 | 2.1332 | 0.3680 | 5.6579 | 0.3415 | 2.2169 | -0.1787 | -0.8796 | -1.1041 | -0.8049 | 0.4397 | -0.8502 |
| 11 | 0.1832 | 1.5804 | 3.5083 | 1.4590 | 0.7428 | -0.1130 | -1.4334 | 0.0015 | -1.8072 | 1.5119 | 0.4337 |
| 12 | -0.7310 | 0.0870 | -0.1742 | -0.1575 | 0.5915 | -0.4346 | -0.9159 | -0.2578 | 0.7140 | -0.6759 | 0.8907 |
| 13 | 2.7935 | -0.8931 | -4.5813 | 0.5369 | -0.6847 | -0.1013 | -1.4829 | 0.5277 | -0.5575 | -1.0497 | -0.6691 |
| 14 | 1.8289 | -0.3080 | 0.0899 | 0.8149 | 0.3501 | -0.7414 | -0.2290 | -0.9883 | 0.8165 | -0.5319 | 1.2520 |
| 15 | 1.7665 | 0.8508 | -0.5526 | -0.7482 | -0.9965 | -0.7184 | 0.3082 | -0.6154 | -0.7188 | -0.7365 | -0.3147 |
| 16 | -0.1327 | -0.0823 | -1.1405 | -0.3155 | -2.3861 | 2.6597 | 2.8524 | -0.0024 | -1.4620 | -0.0941 | -1.5651 |
| 17 | 0.7525 | 1.0252 | 0.2141 | -0.8641 | -0.2397 | 0.8338 | 0.3163 | -0.1673 | 0.5446 | -0.0643 | -0.9161 |
| 18 | 3.4286 | 0.1011 | -0.9679 | 0.0987 | -0.2848 | -0.4250 | 0.1138 | 0.6423 | -0.2163 | -0.5108 | 0.3148 |
| 19 | 1.3715 | -0.8801 | 0.2260 | -0.7216 | 0.3993 | -0.0641 | -0.9910 | 1.1821 | 0.0116 | 1.1377 | 1.0548 |
| 20 | -0.6962 | 0.9153 | 1.3735 | 0.8503 | 1.1467 | -0.3151 | -0.6001 | 0.6951 | 1.7822 | 0.9894 | 0.6836 |
| 21 | 0.7518 | -0.1576 | -1.5838 | -0.2189 | -2.1248 | -1.2627 | -5.8174 | -1.6841 | -0.7174 | 0.0049 | -1.0976 |
| 22 | 0.7758 | 0.2388 | -0.9068 | 1.0276 | -0.0445 | -0.6958 | 0.1181 | -0.0094 | -1.7416 | 0.4473 | -1.5565 |
| 23 | 1.5550 | -0.6676 | -0.0914 | 0.0021 | -0.7495 | -0.0787 | -0.9889 | -0.4217 | -0.3496 | -0.8395 | -1.9280 |
| 24 | -0.3771 | 1.0785 | 2.0761 | -0.2233 | -1.2740 | -0.4120 | 0.7712 | 0.7173 | 0.6180 | -0.9139 | -1.1898 |
| 25 | -0.0011 | -0.6947 | 1.0263 | 0.5836 | -0.6870 | 0.5049 | 0.7365 | -0.2268 | 0.7680 | 0.0032 | 0.9472 |
| 26 | 2.9507 | 1.3278 | 0.4009 | 1.2611 | -0.1335 | -0.6342 | -3.4457 | 0.9216 | -0.6261 | 1.1022 | 0.1006 |
| 27 | -0.0127 | -0.0386 | -2.2836 | 3.9605 | 3.8899 | 3.9393 | 3.5943 | 3.9544 | 3.3130 | 0.0573 | -1.3247 |
| 28 | 0.3456 | -0.0563 | -1.2767 | 2.3966 | 2.0744 | 2.6391 | 3.1686 | -0.4076 | -2.6516 | 3.0367 | -1.4956 |
| 29 | 0.1024 | 3.2167 | 3.6295 | 2.7593 | 2.0213 | -0.6534 | -3.3911 | 0.0559 | -1.4836 | 0.0215 | -1.4520 |
| 30 | -0.2143 | 0.2669 | 0.0008 | -0.6616 | -1.5638 | 1.3279 | 2.4203 | -0.3333 | -4.7898 | 0.8592 | -0.5490 |
| 31 | 1.9911 | 0.8214 | 0.0616 | -0.1038 | -1.3746 | 0.0002 | 0.7220 | -0.0870 | 0.5285 | 0.9407 | -0.7625 |
| 32 | -0.0697 | 1.5755 | 2.2935 | 0.9061 | 0.3556 | 1.4376 | 1.5360 | -0.0422 | -1.2457 | 0.0060 | -1.0368 |
| 33 | -0.6689 | -0.0005 | 0.2518 | -0.2759 | -1.4687 | -0.1683 | 1.0046 | -0.8548 | 1.2281 | -0.7771 | 0.1081 |
| 34 | -0.0915 | -0.9651 | -0.2427 | 0.5747 | -2.3563 | 1.1688 | 1.6646 | -0.2392 | -1.1984 | 0.0582 | -0.5705 |
| 35 | 0.1751 | -0.0003 | 0.7486 | 0.3164 | -2.7156 | 1.4072 | 1.3596 | 1.6342 | 0.5087 | 2.2814 | 6.6816 |
| 36 | 0.7604 | 0.0338 | -1.3914 | -1.1318 | 0.1224 | -0.2372 | -4.0731 | 0.2763 | -1.9127 | 0.0020 | 1.0251 |
| 37 | -0.8792 | 0.8012 | -1.0052 | -0.0804 | -0.2125 | 0.2460 | -1.8441 | -0.1112 | -1.5228 | 1.2137 | 1.5181 |
| 38 | -0.1211 | -0.2169 | -2.1232 | -0.6990 | -2.9214 | -0.3946 | -2.4244 | 1.7754 | 1.4913 | 0.1864 | -2.2417 |
| 39 | 0.7716 | -0.8083 | -3.3947 | -0.3806 | -1.4543 | -0.1898 | -1.6204 | -1.0117 | -0.4389 | -0.2180 | -1.5432 |
| 40 | 0.7360 | -0.0075 | -0.3530 | 0.1612 | -1.4418 | 2.3933 | 2.5532 | -1.6428 | -0.6621 | 2.5707 | 1.3956 |
| 41 | 0.5905 | 0.1186 | 1.0253 | -0.0975 | 1.6878 | 0.0745 | 0.3914 | -0.8045 | -0.3255 | 0.9151 | 0.5906 |
| 42 | 0.9713 | 0.4092 | -1.8882 | 0.0000 | 0.4017 | -0.9038 | -0.0732 | 1.5085 | 0.9130 | -0.1606 | 1.6552 |
| 43 | -0.4385 | 0.9428 | 0.2368 | -0.2408 | 0.5434 | -0.0799 | 0.6531 | -0.1072 | -0.3689 | -0.9261 | 0.7720 |
| 44 | -0.5077 | 1.1909 | 2.3567 | 1.1537 | 2.7854 | 0.7103 | 0.2168 | 1.2430 | 0.5540 | -0.7422 | -1.8683 |
| 45 | -0.6059 | 0.8519 | 0.5242 | 0.3974 | 0.6886 | 0.5922 | 0.7160 | 0.1536 | 0.5666 | 0.4507 | -0.1265 |
| 46 | 1.0033 | -0.9804 | -3.3034 | -1.1649 | -0.8705 | 2.1751 | 0.8671 | 0.0116 | -1.1726 | -0.1319 | -1.7447 |
| 47 | 2.2638 | -0.8227 | -0.9122 | 0.4325 | 2.3523 | -1.0544 | -0.8423 | 0.5773 | -0.5617 | -1.2228 | -1.2803 |
| 48 | 4.1658 | -0.1851 | 0.3232 | 0.8816 | 0.4581 | 0.6251 | -0.9081 | 0.7161 | -0.0775 | -0.7618 | -0.5188 |

**Table S3 Gaussian function parameters of FWNNTU.**

| Rules | WT | | pH | | DO | | EC | | NH4+-N | |
| --- | --- | --- | --- | --- | --- | --- | --- | --- | --- | --- |
|  | q |  | q |  | q |  | q |  | q |
| 1 | -0.1384 | 0.1264 | 0.7815 | 0.3825 | 0.3703 | 0.4510 | -0.0152 | -0.9358 | 0.4783 | 1.0354 |
| 2 | 0.4652 | 0.8286 | 0.7983 | -0.2803 | 0.1889 | 0.8819 | 0.0789 | -0.1072 | -0.9244 | 0.7674 |
| 3 | 0.1336 | -0.8632 | 0.2597 | -0.5442 | 0.1804 | 0.5191 | -0.7200 | -0.1749 | -1.0930 | 0.6445 |
| 4 | -0.3769 | -0.4335 | -0.8047 | -0.2649 | -0.0639 | 0.8289 | -0.4512 | 0.1694 | 0.0139 | 0.8201 |
| 5 | 0.2907 | 0.7174 | 0.7861 | 0.2950 | 0.2885 | -1.1350 | 0.6278 | 3.8891 | -0.1673 | 0.1747 |
| 6 | 0.2054 | -0.9577 | 0.2814 | -0.7482 | -0.2572 | -4.1780 | 0.6496 | -0.2985 | -0.4960 | 0.0845 |
| 7 | 0.2541 | -4.0917 | 0.2924 | 1.4210 | 0.2690 | 0.6406 | 1.0475 | 0.4108 | -0.3661 | -0.3787 |
| 8 | -0.5254 | -0.7741 | -0.8403 | 0.6184 | 0.4824 | -0.2942 | 0.9719 | -0.3919 | 0.7212 | 0.8751 |
| 9 | -0.1296 | -9.1018 | -1.6315 | -1.0079E+3 | -0.9836 | 0.2678 | -0.5945 | 0.1204 | -0.3715 | 0.9228 |
| 10 | 0.8641 | 0.3909 | 2.4076 | 3.4444E+3 | -0.1392 | -1.0659 | -1.0810 | -1.5843E+2 | 0.4954 | -2.5102 |
| 11 | 0.7623 | -0.3625 | 1.0808 | 0.2069 | 0.4966 | 17.7808 | -0.2443 | -0.9420 | -0.7000 | -0.7255 |
| 12 | -0.6838 | 0.2247 | 1.0133 | -5.1085 | 0.6251 | 1.2936 | 0.4918 | 0.1761 | -1.0001 | 0.4957 |
| 13 | -1.0568 | 0.5212 | -0.5941 | 0.1752 | 0.6328 | -0.5856 | 0.7020 | -1.8238 | -0.5742 | -0.8316 |
| 14 | 0.2348 | -0.7399 | -0.1476 | -0.0969 | -0.9623 | -0.2883 | 0.0630 | -0.4267 | 0.1536 | 0.8289 |
| 15 | -0.5809 | 0.3229 | 0.5228 | 0.6711 | 0.3403 | 0.6836 | 0.0245 | -0.3332 | 0.4940 | 0.0393 |
| 16 | -1.2885 | 0.3955 | -0.0931 | 0.1629 | 0.4853 | 2.6328 | 0.4236 | -5.1832 | 0.5338 | -1.0987 |
| 17 | 0.6722 | -0.4175 | -0.9526 | 0.4730 | 0.4426 | 0.7083 | 0.8523 | 0.2598 | -0.0253 | 0.2668 |
| 18 | -1.0261 | 0.4369 | 0.0361 | -0.8568 | -0.2243 | -0.6798 | -0.8331 | -16.7509 | 0.8488 | 0.5168 |
| 19 | 0.0801 | 1.8911 | 0.2706 | -2.1625 | 0.2487 | -6.1139 | 0.2705 | -3.4340 | 0.3594 | 0.1300 |
| 20 | -1.1657 | 5.7117 | 0.9209 | 1.0221 | 1.1091 | -1.515OE+2 | 0.6707 | -0.0954 | 0.1448 | 0.9858 |
| 21 | 0.3599 | 0.5427 | -0.6367 | -0.7330 | -0.1939 | 7.6822 | -0.6584 | 7.7212 | -1.4025 | -0.1701 |
| 22 | -0.6935 | 0.8146 | 0.5165 | 0.7479 | -0.9137 | -1.0459 | -0.1023 | -0.5710 | 0.1799 | 1.0677 |
| 23 | -0.3245 | -0.8445 | 0.5640 | -4.2911 | 0.6817 | 0.5314 | 1.2033 | -0.1879 | 0.5860 | 1.2299 |
| 24 | -0.1748 | -0.7536 | 0.7000 | -0.8833 | 0.3982 | 0.4194 | 0.3480 | -0.7317 | 0.8049 | 0.2879 |
| 25 | -0.5769 | 0.3310 | -0.4757 | -0.4707 | 0.6912 | 0.7728 | 0.5901 | -0.3004 | -0.6679 | -0.6015 |
| 26 | 0.2851 | 1.8022 | 1.1947 | 0.2184 | -0.9083 | 0.3569 | -0.8580 | 3.3631 | -0.3009 | -0.8565 |
| 27 | -0.1078 | -0.8713 | -0.8422 | 0.1461 | -0.1505 | 0.7289 | -0.3527 | 1.0722 | -0.1133 | 0.9778 |
| 28 | 0.7033 | 0.1105 | 0.0582 | -0.8694 | 0.3289 | -1.0145 | -0.6616 | -0.1746 | 0.6079 | -10.8493 |
| 29 | 0.3538 | 0.8959 | -0.1792 | 0.2671 | 0.5867 | 0.9361 | 0.6771 | -0.3864 | -0.1325 | 0.3826 |
| 30 | -0.8739 | 0.7518 | -0.7669 | 0.4296 | -0.0811 | -0.6295 | -0.2458 | -0.5904 | -0.7037 | 5.5249 |
| 31 | 4.8690 | 1.9759E+4 | -0.6207 | 0.3653 | -0.9883 | -0.3515 | 0.9723 | -0.4060 | 0.8858 | -0.2040 |
| 32 | 0.2944 | 0.4727 | -0.6639 | -25.6848 | -0.7955 | 2.9657 | 0.0966 | -2.4084 | 0.8158 | -1.0960 |
| 33 | -0.3031 | -0.9916 | 0.4290 | -0.5640 | -0.3588 | -0.6464 | 0.1212 | -0.8333 | 0.0761 | -0.1922 |
| 34 | 1.0399 | -0.6067 | 1.1253 | 0.1717 | 0.9955 | 38.7964 | 0.4166 | -0.8665 | -0.9737 | 0.4005 |
| 35 | -0.4045 | 1.0843 | -0.0509 | 0.5128 | 0.4365 | -0.6216 | -1.1502 | -0.7258 | 0.5215 | 0.7385 |
| 36 | 0.7043 | 0.4083 | 0.0977 | 0.4810 | 0.3385 | 0.7882 | 0.7343 | 0.5024 | -0.2924 | 0.7527 |
| 37 | -0.9988 | -0.4016 | 0.0822 | -0.2910 | 0.2599 | 0.7267 | 0.8598 | -4.1286 | 1.2819 | 0.0571 |
| 38 | -0.7101 | -24.8502 | 0.8741 | -0.8425 | 0.6343 | 0.6601 | -0.5482 | 0.9520 | -0.9637 | 0.3499 |
| 39 | -0.5351 | 0.4579 | -0.5651 | 0.4156 | -1.0725 | 35.3621 | -0.2608 | -0.0923 | 0.7068 | 0.6568 |
| 40 | -0.2343 | 0.7745 | 0.6300 | -0.3729 | 0.0989 | 0.2007 | -1.3797 | -0.6070 | -0.1498 | 0.6747 |
| 41 | -0.4102 | -0.9438 | 0.8175 | -23.8760 | 0.4004 | -0.3413 | -0.8252 | -0.9057 | 0.1236 | -3.6782 |
| 42 | 0.1573 | 1.0534 | -0.1857 | -0.2259 | -0.7352 | 0.7862 | 0.8955 | -135.5863 | -0.3512 | 1.0312 |
| 43 | -0.6999 | 0.4904 | -0.4635 | -0.2155 | -0.3196 | -0.4895 | 1.3019 | -9.0123E+2 | 1.0671 | 0.1506 |
| 44 | 0.6519 | 0.9937 | -0.5556 | -0.3255 | -0.4468 | -0.6523 | -0.7565 | -0.2785 | 1.0011 | 13.7090 |
| 45 | -0.6819 | -9.0891 | 0.1345 | 31.1156 | -0.8169 | -0.3418 | -0.1664 | 1.4276 | -1.5816 | 3.1135E+2 |
| 46 | 0.8600 | 0.2083 | -12.7241 | 0.1627 | -0.6111 | -0.5522 | -0.6528 | -0.5410 | -0.7392 | 0.2995 |
| 47 | 0.3357 | -0.6379 | 0.6448 | -0.9211 | 0.7034 | 0.7020 | -34.2301 | -3.2702E+5 | 0.0330 | 0.3927 |
| 48 | 0.9236 | 0.5090 | 0.2068 | 0.8996 | 0.4986 | -9.5981 | 0.5421 | -0.2526 | 0.1601 | 1.0731 |

**Table S4 The wavelet layer parameters of FWNNTU.**

| Rules |  | WT | | pH | | DO | | EC | | NH4+-N | |
| --- | --- | --- | --- | --- | --- | --- | --- | --- | --- | --- | --- |
| *a* | *b* | *a* | *b* | *a* | *b* | *a* | *b* | *a* | *b* |
| 1 | 1.4488 | -0.9774 | -0.7387 | 0.4516 | 0.1247 | 0.9055 | 0.4698 | 0.7476 | 2.4094 | 1.0299 | 2.9950 |
| 2 | -0.0132 | -0.1294 | -1.6097 | -0.8215 | -2.5543 | -0.1649 | -1.4862 | 0.3590 | -1.9365 | -0.0860 | -1.0493 |
| 3 | -0.0049 | 6.0078 | 5.9325 | 5.8125 | 6.5148 | 5.7762 | 6.1132 | 6.0822 | 5.2130 | 6.0237 | 5.4834 |
| 4 | 0.3516 | -0.2463 | -2.1014 | 2.8798 | 2.4428 | -0.0467 | -1.3812 | -0.0346 | 0.8271 | 3.2484 | 2.7162 |
| 5 | 0.7213 | -1.1553 | -5.1628 | -1.0911 | -4.5515 | 0.2165 | 1.8770 | -1.6722 | -0.3029 | 2.3191 | 2.3238 |
| 6 | 0.3107 | -0.0118 | 1.4310 | -0.4596 | -2.4635 | 0.1896 | -1.7140 | 1.5742 | 1.2603 | 1.7857 | 1.2176 |
| 7 | 0.7310 | -1.0988 | 0.5039 | -0.9336 | 0.3168 | 0.0026 | -0.7860 | 0.0002 | -0.7908 | 1.0121 | 2.2751 |
| 8 | 0.4304 | -0.5556 | 0.7855 | 0.6014 | 0.9768 | 0.3683 | -1.0716 | -0.0189 | -0.5516 | -0.7759 | 0.2362 |
| 9 | 0.3025 | 1.0688 | 1.0580 | -0.2616 | -1.6523 | -0.0896 | -1.4423 | 1.1198 | 0.5653 | 1.1642 | 0.7445 |
| 10 | 0.2469 | 3.6952 | 4.4958 | -0.4809 | -6.5936 | 3.8762 | 3.2761 | -0.0001 | 0.2979 | -2.9392 | -1.7218 |
| 11 | 0.4544 | -0.5788 | 0.7711 | 0.6423 | 1.7050 | -0.5429 | -1.8351 | -0.0729 | 0.2684 | -0.4225 | -0.0884 |
| 12 | 4.6005 | 0.7114 | -0.5470 | 0.6861 | 0.0663 | -0.2420 | -0.0906 | -0.3562 | -0.1327 | -0.4496 | 1.0545 |
| 13 | 0.9841 | 0.8879 | 0.1539 | -0.6188 | -1.0152 | -0.2224 | 0.8598 | 0.5037 | 0.0224 | -0.1586 | -1.6882 |
| 14 | -0.3223 | 0.5192 | -1.6071 | -0.6411 | -0.3571 | -0.1662 | -1.5085 | 0.6154 | -0.2964 | 0.5518 | 0.7454 |
| 15 | 1.6444 | 0.4466 | 0.7139 | -0.9861 | 0.5909 | -0.5273 | -0.0910 | -0.3731 | 1.1574 | -0.2164 | 0.1339 |
| 16 | 1.6869 | 0.7974 | -0.1066 | -0.9556 | -0.0479 | 0.5306 | 0.7450 | 0.0631 | -0.8487 | -0.7252 | 0.0357 |
| 17 | -1.5610 | 0.2315 | 0.9503 | -0.2034 | 0.0372 | -0.9559 | 0.9246 | -0.2040 | -0.4311 | -0.5742 | 0.9450 |
| 18 | 0.1894 | 0.5053 | 1.7450 | 0.0265 | 1.8104 | -0.4303 | 1.9259 | 0.6912 | -0.8159 | 0.1250 | 0.9799 |
| 19 | -0.0044 | 2.2921 | 1.9277 | -0.2826 | -1.9309 | 2.3755 | 2.0222 | -0.0298 | 0.6049 | -0.2259 | -3.8853 |
| 20 | -0.2521 | -0.7975 | 0.4901 | -1.0635 | -0.7781 | -0.3327 | -0.8467 | 0.0583 | 0.6830 | -0.8084 | 0.0661 |
| 21 | -0.4598 | 1.9918 | 2.1630 | 2.2583 | 2.0332 | -0.2396 | -1.4319 | -0.3875 | -1.0851 | 0.0088 | 0.5895 |
| 22 | 0.5190 | 4.7415 | 4.2638 | 3.7158 | -0.5526 | 5.0160 | 4.4556 | -0.1406 | -2.5129 | 4.7412 | 4.3682 |
| 23 | 1.1758 | 1.1501 | 0.5361 | 0.8110 | 0.2732 | 1.1145 | 1.4403 | 1.1605 | 0.4598 | 0.1317 | 0.9677 |
| 24 | 0.4585 | -0.4705 | 0.2506 | 0.4519 | 0.4823 | -0.4782 | -0.6944 | 0.1112 | -0.5842 | -0.4804 | -1.5494 |
| 25 | 2.1949 | -0.5869 | 0.7662 | -0.3476 | 0.6873 | -0.9617 | -0.9103 | 0.6963 | -0.3379 | 0.5462 | 0.4338 |
| 26 | -0.8322 | -0.4332 | 0.6361 | 0.5149 | -0.0552 | -0.4283 | 1.5049 | -0.2118 | 0.3743 | 0.4779 | 1.4207 |
| 27 | 1.4478 | 0.4721 | -3.0464 | 2.2086 | 1.3037 | 0.0639 | -1.0907 | 2.3639 | 1.5819 | -1.6838 | -0.5859 |
| 28 | 0.1169 | -0.8872 | 0.3007 | -1.0697 | -4.7017 | -0.1768 | -0.9950 | -0.9558 | -1.0341 | 2.3023 | 2.5464 |
| 29 | 0.4010 | -0.5448 | 1.0122 | 0.3800 | -1.1998 | 1.0776 | 0.9059 | -0.1249 | -0.9676 | 1.1124 | 0.4800 |
| 30 | 0.6858 | 1.7037 | 0.6126 | -1.9356 | -0.6810 | -0.0709 | -1.3776 | -0.0031 | -1.0902 | -0.3698 | -1.8642 |
| 31 | -1.7753 | -0.9887 | 0.7100 | -0.5902 | -0.7247 | -0.3830 | -0.8416 | -0.0365 | 0.3380 | -0.6361 | 0.6525 |
| 32 | -0.5406 | 1.7978 | 2.0319 | -0.3653 | -4.4515 | -0.1659 | -0.6237 | 2.0718 | 1.4392 | -0.0506 | -1.1874 |
| 33 | -0.2100 | 1.7197 | 1.6311 | -0.1415 | -1.5124 | 0.0293 | -1.2591 | 0.2771 | -2.4329 | 2.1935 | 2.0743 |
| 34 | 0.7698 | -0.5163 | -0.5477 | 0.0558 | 0.3671 | 2.4512 | 2.5159 | 0.4256 | -4.3454 | -0.0930 | -1.4094 |
| 35 | -0.0204 | 2.7518 | 2.5492 | -0.1529 | -1.2875 | 3.4391 | 3.4874 | 3.4763 | 3.2445 | 3.3125 | 2.6999 |
| 36 | 1.9021 | -0.0911 | -0.2383 | -1.2049 | -0.1981 | -0.0185 | -0.4987 | -1.1223 | -0.8406 | 0.7093 | 0.1337 |
| 37 | 0.5533 | 0.3304 | -0.1784 | -0.3978 | -1.0927 | -0.2164 | 1.6223 | 0.1027 | 0.3362 | 0.5032 | 0.1624 |
| 38 | 0.5846 | -0.0559 | -1.3058 | 1.4753 | 0.9351 | -0.5054 | -9.3221 | -2.1511 | -2.7914 | -0.7176 | -3.5502 |
| 39 | 1.5347 | 0.3402 | 0.7557 | -0.6738 | 0.8508 | 0.7896 | 0.1284 | 0.8742 | 0.7786 | -0.1351 | 0.5775 |
| 40 | 0.5550 | -1.9462 | 0.2302 | 0.1651 | -1.6475 | -0.5125 | -3.1049 | 0.3754 | 1.9046 | 0.0018 | -0.5565 |
| 41 | 2.0285 | 1.4075 | 0.0117 | 1.4106 | 1.1075 | -0.3570 | -1.3465 | -0.9922 | -0.2139 | 1.0270 | -1.3341 |
| 42 | 0.9084 | 3.2354 | 2.9181 | 2.6408 | 1.9575 | -0.5786 | -2.5452 | -2.5805 | -1.1916 | 3.3828 | 2.8207 |
| 43 | 2.2383 | -0.8100 | -14.6939 | 0.3677 | 0.3501 | -0.9496 | -0.3905 | -0.6550 | -1.0014 | -1.0130 | -0.8196 |
| 44 | -1.1223 | -0.3782 | 0.0395 | -0.1277 | -0.9400 | -0.8504 | 0.8465 | 0.7785 | 0.7019 | 0.9361 | 0.7926 |
| 45 | -0.2147 | 0.0001 | 0.0853 | 0.0002 | -0.1336 | -0.5909 | -1.3086 | -0.7718 | -0.7938 | -0.1710 | -0.7755 |
| 46 | 0.0531 | 4.4901 | 5.1276 | 4.9236 | 4.6573 | -0.1717 | -1.6027 | 4.9780 | 4.6042 | 4.9581 | 4.2416 |
| 47 | 1.6356 | 0.8476 | 0.5399 | 0.7408 | 0.7970 | 0.1786 | -1.1936 | 0.6466 | -0.4471 | -0.0557 | 0.5935 |
| 48 | -0.3017 | 2.2609 | 2.7998 | -0.2177 | -1.5768 | -0.1209 | -1.4918 | 2.8530 | 2.7915 | -0.3598 | -2.8145 |

**Code**

clear all

clc

warning off

nntwarn off

global X % training data

global P % input data

global t % output data

global S1 % the number of input variables

global S2 % the number of nodes in output layer

global R % the number of fuzzy rule

global S % encoding lengths

global val

global num

epoch =3000;

rate = 0.01; % the learning rate

mom = 0.5; % the momentum factor

num=size(X,2);

pp=mapminmax(X)';

P= pp(:,1:5)';

t =pp(:,6)';

S1=size(P,1);

S2=size(t,1);

m=S1;

n=R;

S=S1*R+S1*R+R*S1+R*S1+R;

aa=ones(S,1)*[-1,1];

popu=100; % The initial population size

initPpp=initializega(popu,aa,'gabpEval');

gen=200;

[x,endPop,bPop,trace]=ga(aa,'gabpEval',[],initPpp,[1e-6 1 1],'maxGenTerm',gen,...

'normGeomSelect',[0.06],['arithXover'],[2],'nonUnifMutation',[2 gen 3]);

figure(1)

subplot(2,1,1)

plot(trace(:,1),1./trace(:,3),'r-')

hold on

plot(trace(:,1),1./trace(:,2),'b-')

xlabel('Generation');

ylabel('Sum-Squared Error');

subplot(2,1,2)

plot(trace(:,1),trace(:,3),'r-')

hold on

plot(trace(:,1),trace(:,2),'b-')

xlabel('Generation');

ylabel('Fittness');

[c,q,w,a,b,u,val,SE,ER]=gadecod(x);

pc = c;

pq = q;

pa = a;

pb = b;

pw = w;

% t+1

nc = zeros(m, n);

nq = zeros(m, n);

na = zeros(n, m);

nb = zeros(n, m);

nw = zeros(1, n);

tu = zeros(epoch, num);

E = zeros(epoch, num);

tic %

for loop1 = 1 : 1 : epoch

for loop2 =1 : 1 : num

W = zeros(1, n);

%y = zeros(1, n);

for i = 1 : 1 : m

PP(i) = P(i,loop2);

end

for i = 1 : 1 : m

for j = 1 : 1 : n

g(i, j) = relation(PP(i), c(i, j), q(i, j));

end

end

for i = 1 : 1 : n

[min, which] = fuzzy(g, m, i);

U(i) = min;

p(i) = which;

end

for i = 1 : 1 : n

for j = 1 : 1 : m

W(i) = W(i) + wavelet(PP(j), a(i, j), b(i, j));

end

end

y = w .* W;

u = defuzz(U, y, n);

tu(loop1, loop2) = u;

temp1 = u - t(loop2);

E(loop1, loop2) = temp1^2 / 2;

temp2 = sigamau(U, n);

Etow = zeros(1, n);

sima = zeros(1, n);

for i = 1 : 1 : n

Etow(i) = temp1 * U(i) * W(i) / temp2;

sima(i) = temp1 * U(i) * w(i) / temp2;

end

temp3 = zeros(n, m);

temp4 = zeros(n, m);

for i = 1 : 1 : n

for j = 1 : 1 : m

temp3(i, j) = varz2(PP(j), a(i, j), b(i, j)); % temp3= z^2

temp4(i, j) = exp(-temp3(i, j)/2) / sqrt(abs(a(i, j))^3); % temp4 = ?

end

end

Etoa = zeros(n, m);

for i = 1 : 1 : n

for j = 1 : 1 : m

temp5 = temp3(i, j); % temp5 = z^2

Etoa(i, j) = sima(i) * (3.5 * temp5 - temp5^2 - 0.5) * temp4(i , j);

end

end

Etob = zeros(n, m);

for i = 1 : 1 : n

for j = 1 : 1 : m

temp5 = temp3(i, j); % temp5 = z^2

Etob(i, j) = sima(i) * (3 * temp5 - temp5^3) * temp4(i , j);

end

end

utoU = zeros(1, n);

for i = 1 : 1 : n

utoU(i) = (y(i) - u) / temp2; % temp2 = sigama(U)

end

[Utoc, Utoq] = Utocq(g, PP, c, q, m, n, p);

Etoc = zeros(m, n);

Etoq = zeros(m, n);

for i = 1 : 1 : m

for j = 1 : 1 : n

temp6 = temp1 * utoU(j);

Etoc(i, j) = temp6 * Utoc(i, j);

Etoq(i, j) = temp6 * Utoq(i, j);

end

end

nw = w - rate * Etow + mom * (w - pw);

na = a - rate * Etoa + mom * (a - pa);

nb = b - rate * Etob + mom * (b - pb);

nc = c - rate * Etoc;

nq = q - rate * Etoq;

% t-1，t

pw = w; w = nw;

pa = a; a = na;

pb = b; b = nb;

c = nc;

q = nq;

end

end

toc %
